# Supplementary material
Source: PubMed Central journal article supplement (PMC4084446)
Supplement: 1314562111_pnas.201314562SI.pdf [file 1314562111_pnas.201314562SI.pdf]

# Supporting Information

Baracho et al. 10.1073/pnas.1314562111

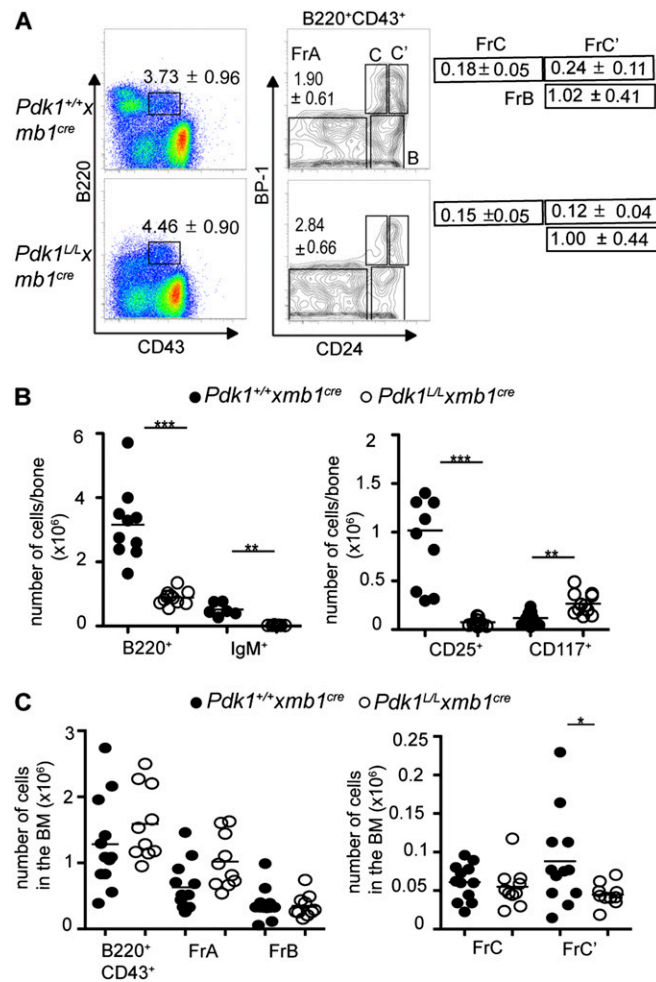

**Fig. S1.** Phosphoinositide-dependent protein kinase-1 (PDK1) is required for early B cell development. (A) Frequency of B cell progenitors based on Hardy's classification. (B) Absolute numbers of total B cells and of the indicated B cell subsets in the bone marrow. Data represent mean  $\pm$  SD of three independent experiments. \* $P < 0.05$ , Mann-Whitney  $U$  test.

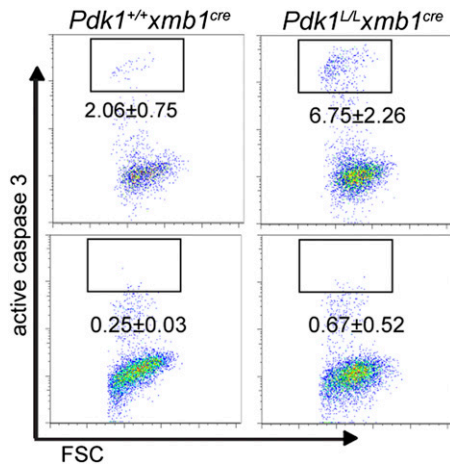

**Fig. S2.** PDK1 regulates pro-B cell survival. Analysis of active caspase-3 on hematopoietic stem cell-derived pro-B cells that were left untreated (*Upper*) or treated overnight with 20 mM of pan-caspase inhibitor Q-VD-OPH (R&D Systems) (*Lower*) before intracellular flow cytometric analysis.

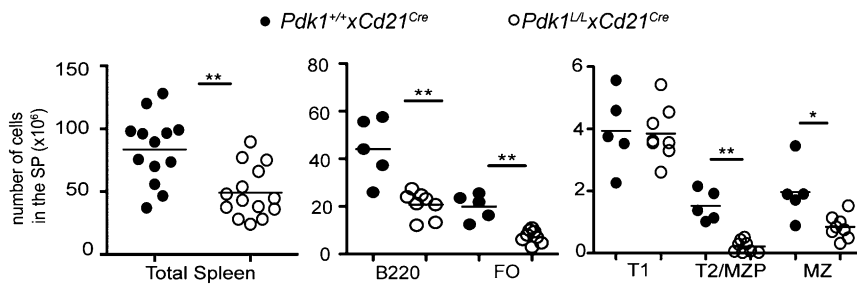

**Fig. S3.** PDK1 is required for peripheral B cell homeostasis. The graphs represent the absolute numbers of splenic cells, B cells, and B cell subsets in the spleens. Data represent mean  $\pm$  SD of three independent experiments. \* $P < 0.05$ , Mann-Whitney *U* test.



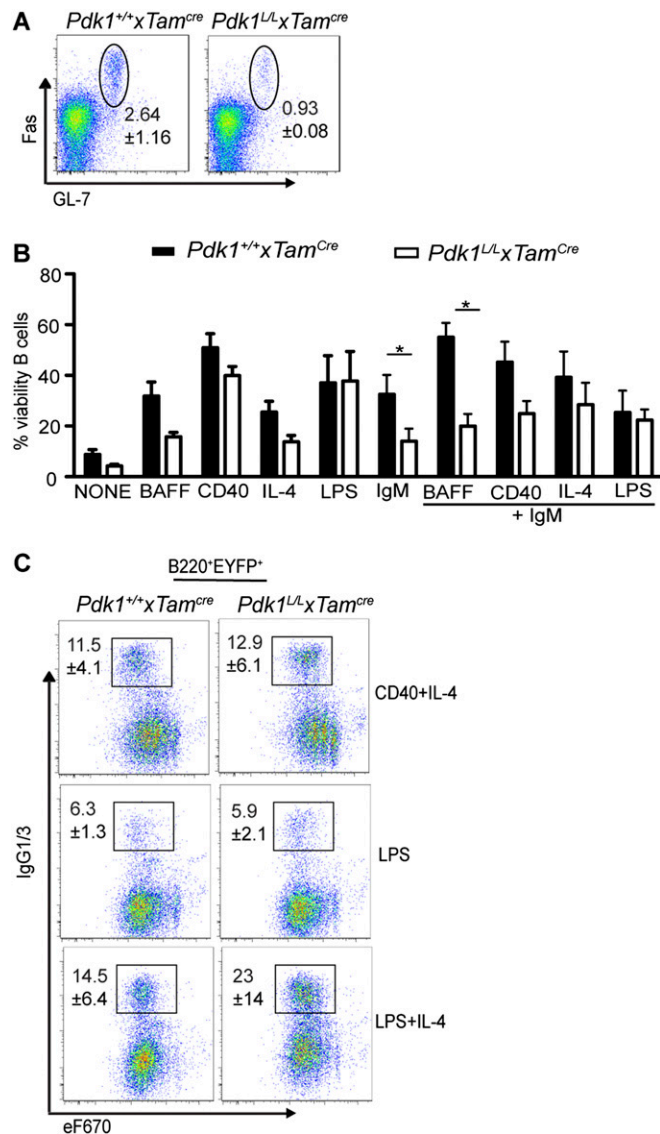

**Fig. 55.** Effect of acute deletion of PDK1 on peripheral B cell activation. (A) Analysis of splenic EYFP<sup>+</sup> GC B cells at 7 d after immunization with SRBCs. Tamoxifen was administered at days 3–5. SDs are shown ( $n = 4$  per group). (B) Spleens were harvested at 5 d after the last injection of tamoxifen, and purified B cells were cultured for 3 d under the indicated conditions. (C) B cells were loaded with eF640 dye and cultured for 3 d under the indicated conditions. Cell division was assessed based on eF640 dilution by flow cytometry. The density plots show the correlated expression of IgG1 (for the cultures with IL-4) or IgG3 (for the cultures with LPS) and eF640 dilution. Data represent the mean  $\pm$  SD of two or more independent experiments. \* $P < 0.05$ , Mann–Whitney  $U$  test.

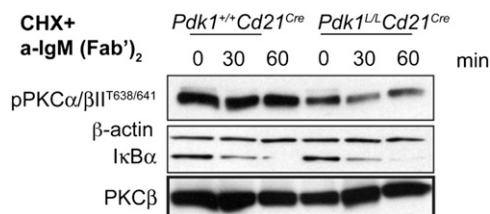

**Fig. 56.** PKC $\alpha$ / $\beta$  activation in *Pdk1<sup>LL</sup> × Cd21<sup>Cre</sup>* B cells. CD43<sup>+</sup>CD9<sup>-</sup> cells were stimulated with 10  $\mu$ g/mL  $\alpha$ -IgM (Fab')<sub>2</sub> for the indicated period in the presence of cycloheximide (CHX) to block de novo protein synthesis and allow for assessment of PKC stability. Whole-cell lysates were prepared for immunoblot analysis for the indicated targets, with  $\beta$ -actin serving as a loading control.
